# Supplementary material for: Excess Risk of Mortality Due to Heatwaves in Dezful city, Southwest of Iran
Source: Research Square preprint supplement (doi:10.21203/rs.3.rs-646456/v1), 2021-06-25
Supplement: Supplementary file 2 [file 8753c4c8e3b0b5b8eeacb61c.docx]

**Appendix 1** Excess risk of Non Accidental Death, Cardiovascular Death and Respiratory Death by HW1


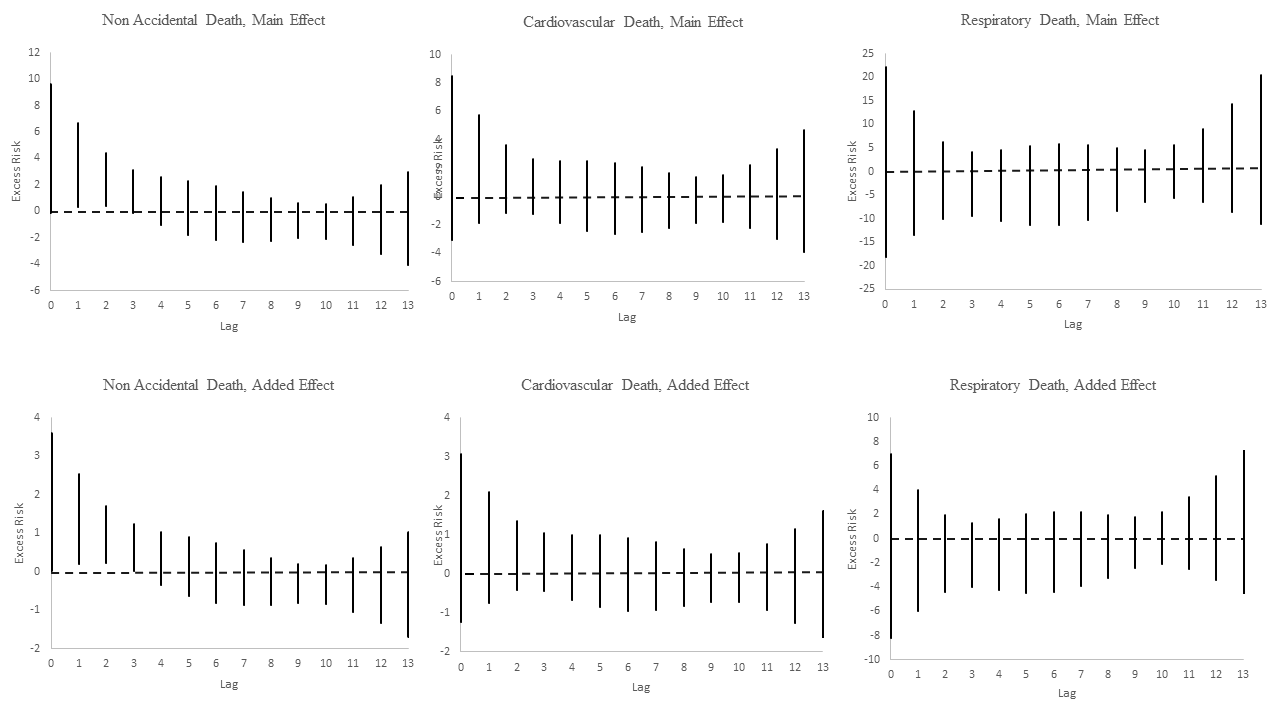


**Appendix 2** Excess risk of Non Accidental Death, Cardiovascular Death and Respiratory Death by HW2


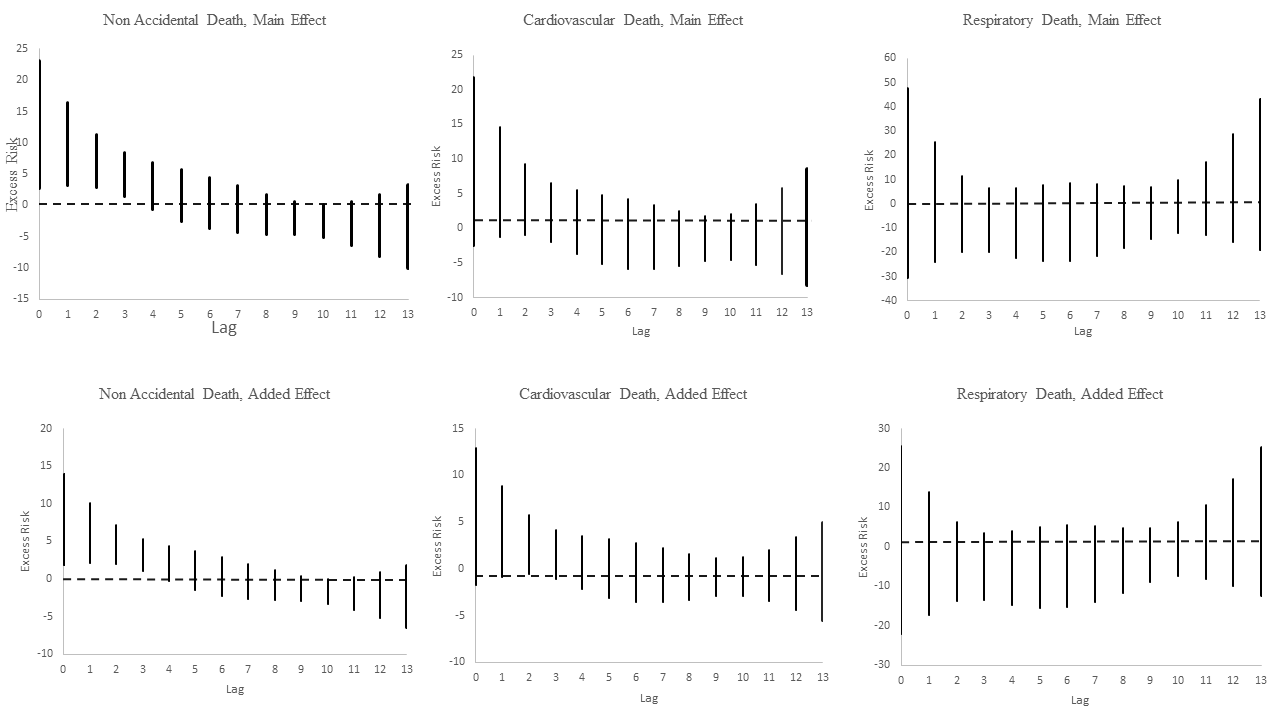


**Appendix 3** Cumulative Excess Risk of Non Accidental Death in Dezful based on age and sex

| Variable | | HW effect | | Lag0 | Lag 0-2 | Lag 0-6 | Lag 0-13 |
| --- | --- | --- | --- | --- | --- | --- | --- |
| Age group | <15 | ME* | HW1 🞟 | 12.07  (-10.89 40.95) | 26.51  (-20.79 83.05) | 29.51  (-53.10 124.81) | 10.48  (-137.22 178.75) |
| HW2 🞟🞟 | 19.64  (-21.29 81.88) | 56.63  (-32.89 180.67) | 121.92  (-43.89 337.37) | 211.28  (-89.47 593.40) |
| AE** | HW1 | 5.02  (-3.63 14.44) | 11.23  (-6.56 30.26) | 13.05  (-18.37 46.20) | 5.33  (-51.96 65.47) |
| HW2 | 13.38  (-12.51 46.95) | 37.88  (-17.88 106.12) | 79.00  (-23.08 199.06) | 131.80  (-53.55 346.81) |
| 15-64 | ME | HW1 | 4.66  (-3.27 13.26) | 12.21  (-4.34 29.82) | 20.43  (-8.93 51.26) | 14.04  (-38.60 69.07) |
| HW2 | 11.48  (-4.43 30.06) | 27.47  (-6.12 65.38) | 36.94  (-22.56 102.52) | 6.73  (-96.86 119.91) |
| AE | HW1 | 1.97  (-1.01 5.06) | 5.10  (-1.13 11.48) | 8.34  (-2.72 19.63) | 5.84  (-14.25 26.29) |
| HW2 | 7.55  (-2.31 18.42) | 18.06  (-2.76 40.51) | 24.27  (-12.81 63.66) | 5.22  (-60.33 74.50) |
| 65-74 | ME | HW1 | 4.40  (-7.27 17.54) | 8.77  (-15.65 35.57) | 7.92  (-35.27 54.42) | 16.36  (-62.60 100.80) |
| HW2 | 8.72  (-13.62 36.85) | 25.73  (-22.60 83.58) | 52.73  (-35.48 154.57) | 51.83  (-103.71 229.10) |
| AE | HW1 | 1.62  (-2.82 6.29) | 3.12  (-6.20 12.79) | 2.36  (-14.20 19.40) | 5.85  (-24.27 36.95) |
| HW2 | 5.41  (-8.70 21.72) | 15.61  (-14.65 49.47) | 31.21  (-23.77 91.36) | 31.85  (-66.34 138.41) |
| >=75 | ME | HW1 | 5.20  (-2.56 13.58) | 10.83  (-5.24 27.90) | 9.21  (-18.94 38.74) | -4.61  (-55.37 48.39) |
| HW2 | **15.84*****  **(0.47 33.57)** | **32.53*****  **(0.67 68.17)** | 29.25  (-25.76 89.50) | 6.79  (-89.71 111.57) |
| AE | HW1 | 1.67  (-1.23 4.66) | 3.62  (-2.41 9.80) | 3.42  (-7.25 14.30) | -2.55  (-22.04 17.25) |
| HW2 | **9.47*****  **(0.14 19.67)** | **19.91*****  **(0.41 40.81)** | 18.94  (-15.28 55.15) | 4.00  (-56.79 67.99) |
| Sex | Male | ME | HW1 | 5.71  (-0.59 12.42) | **13.56*****  **(0.48 27.27)** | 19.01  (-3.98 42.91) | 16.06  (-25.31 58.89) |
| HW2 | **17.83*****  **(4.58 32.75)** | **39.61*****  **(12.15 69.77)** | 47.18  (-0.30 98.42) | 29.60  (-53.05 118.13) |
| AE | HW1 | 2.33  (-0.01 4.73) | **5.55*****  **(0.67 10.52)** | 7.86  (-0.77 16.62) | 6.84  (-8.86 22.76) |
| HW2 | **11.25*****  **(3.27 19.84)** | **25.23*****  **(8.59 42.86)** | **30.53*****  **(1.35 61.12)** | 20.26  (-31.35 74.12) |
| Female | ME | HW1 | 3.28  (-4.10 11.23) | 6.38  (-8.97 22.66) | 3.87  (-23.30 32.32) | -3.05  (-52.54 48.55) |
| HW2 | 5.08  (-9.03 21.40) | 14.56  (-15.68 48.41) | 27.28  (-27.53 87.25) | 12.49  (-84.65 117.96) |
| AE | HW1 | 1.09  (-1.70 3.98) | 2.17  (-3.65 8.14) | 1.31  (-9.06 11.88) | -2.32  (-21.36 17.01) |
| HW2 | 2.83  (-6.06 12.59) | 8.52  (-10.46 28.91) | 16.85  (-17.55 53.24) | 5.94  (-55.58 70.72) |
| Labels:  ME*: Main effect, AE**: Added effect  Bold typeface with***: Indicates statistical significance at p<0.05.  HW1🞟: Heat wave1,  HW2🞟🞟: Heat wave2 | | | | | | | |
